# Supplementary material for: Teeth as an Indicator of the Environmental Exposure of Silesia Province’s Inhabitants in Poland to Metallic Trace Elements
Source: MDPI journal article supplement (doi:10.3390/toxics12010090), 2024-01-20
Supplement: s1 [file s1]

---

# Supplementary Materials

**Table S1.** The median concentration of heavy metals in the teeth of residents of three cities, and PM<sub>10</sub>, Pb, and Cd in the air.

| City      | Heavy metal concentrations in teeth [mg/kg] |        |       | Heavy metal concentrations in air (1989-2008) |             |             |
|-----------|---------------------------------------------|--------|-------|-----------------------------------------------|-------------|-------------|
|           | Hg                                          | Pb     | Cd    | PM <sub>10</sub> [µg/m³]*                     | Pb [ng/m³]* | Cd [ng/m³]* |
| Chorzów   | 453.378                                     | 0.165  | 0.047 | 98.260                                        | 274.344     | 7.055       |
| Katowice  | 5.543                                       | 6.708  | 0.009 | 82.430                                        | 219.200     | 5.195       |
| Sosnowiec | 0.75                                        | 27.147 | 0.973 | 86.030                                        | 191.388     | 5.940       |

\*source: data from 1989-2001 - Provincial Sanitary and Epidemiological Station in Katowice, Poland; data from 2002-2008 - Provincial Inspectorate of Environmental Protection in Katowice.
